# Supplementary material
Source: Springer Nature journal article supplement (https://www.springermedizin.de/resource/supplementary/13063_2013_1549_MOESM3_ESM.pdf/9620270)
Supplement: MOESM3 [file 9620270]

Initial Recruitment of Potentially Eligible FC Patients  
Assessed for eligibility (n=? )

**1<sup>st</sup> Screening Inclusion Criteria**

- a. either gender aged 18 to 65 years
- b. have FC diagnosed as Rome III criterial
- c. complete spontaneous bowel movement (CSBM)  $\leq 2$ times/wk;
- d. severity of constipation  $\geq 3$ pts (7 pts scale from 0 to 6pts) and the overall scoring of constipation-related symptoms  $\geq 6$ pts (6items in 7pts scale) for self-symptom assessment in the run-in period
- e. normal colonic evaluation (colonoscopy or barium enema) within 12 months
- f. normal liver and renal function in blood test within 3 months

**1<sup>st</sup> Screening Exclusion Criteria**

- a. drug-induced constipation
- b. secondary causes of constipation (i.e. medical history of diabetes mellitus and thyroid disease)
- c. abdominal surgery (i.e. Caesarean operation)
- d. severe diseases (i.e. cancer and acute present asthma);
- e. allergy to CHM (i.e. G6PD deficiency), senna and tartrazine
- f. pregnancy or breast-feeding;
- g. psychiatric or addictive disorders with medications which have side effects of constipation.

CM study team conduct 2<sup>nd</sup> screening using criteria of CM excessive syndrome

Baseline eligibility screening (Excluded n=?, reasons)

Baseline assessments (stool and symptoms diary and blood test, abdominal X-ray)

Randomization (n=291)

97 patients allocated to  
Active MZRW  
Placebo Senna x 8 wks

97 patients allocated to  
Placebo MZRW  
Placebo Senna x 8 wks

97 patients allocated to  
Placebo MZRW  
Active Senna x 8 wks

Outcome assessments & 8-week post treatment follow up assessments.  
Analyzed (n=? ) Excluded from analysis (reasons) (n= ?)
